# Supplementary material for: Novel Graphene/In2O3 Nanocubes Preparation and Selective Electrochemical Detection for L-Lysine of Camellia nitidissima Chi
Source: MDPI journal article supplement (doi:10.3390/ma13081999), 2020-04-24

Supplementary Materials

# Novel Graphene/In<sub>2</sub>O<sub>3</sub> Nanocubes Preparation and Selective Electrochemical Detection for L-Lysine of *Camellia nitidissima* Chi

Jinsheng Cheng <sup>1,\*†</sup>, Sheng Zhong <sup>2†</sup>, Weihong Wan <sup>1,3</sup>, Xiaoyuan Chen <sup>1</sup>, Ali Chen <sup>4</sup> and Ying Cheng <sup>3</sup>

<sup>1</sup> Henry-Fork School of Food Sciences, Shaoguan University, Shaoguan 512005, China; weihongsgu@163.com (W.W.); xychensgu@126.com (X.C.)

<sup>2</sup> Shipai Branch, Dongguan Environmental Protection Bureau, Dongguan 523330, China; jasonwow@163.com

<sup>3</sup> Foshan Qionglu Health Tech. Ltd., Foshan 528000, China; yingchenggd@163.com

<sup>4</sup> School of Pharmacy, Guangdong Pharmaceutical University, Guangzhou 510006, China; chenali2004@163.com

\* Correspondence: chengjins@gmail.com

† These authors contributed equally to this work.

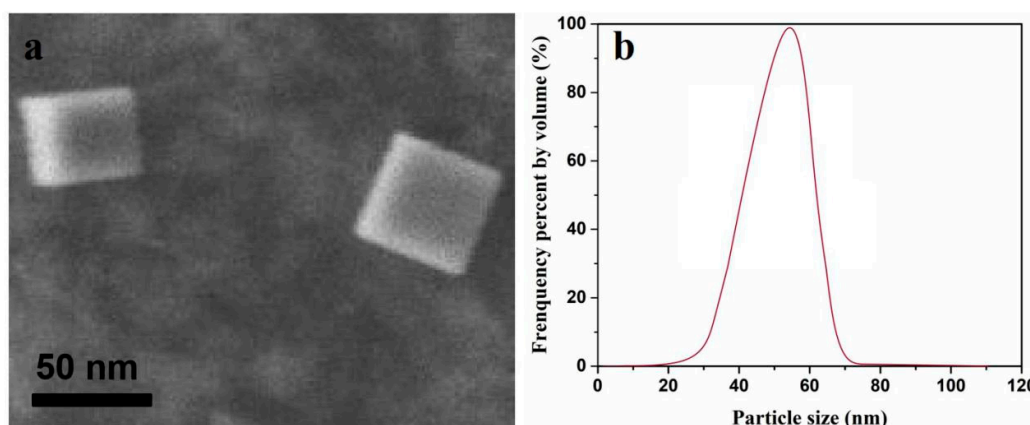

**Figure S1.** (a) SEM images of GR/In<sub>2</sub>O<sub>3</sub> nanocubes, (b) Particles size distribution image of the prepared GR/In<sub>2</sub>O<sub>3</sub> nanocubes.

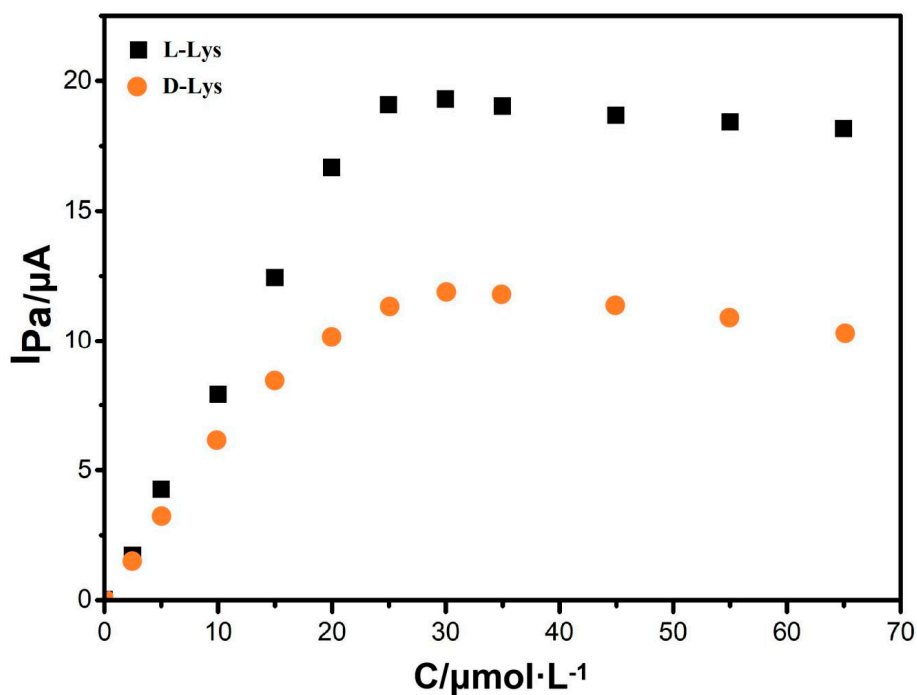

**Figure S2.** Response curves for the currents of L-Lys and D-Lys by the prepared GR/In<sub>2</sub>O<sub>3</sub> nanocubes based electrochemical sensor.

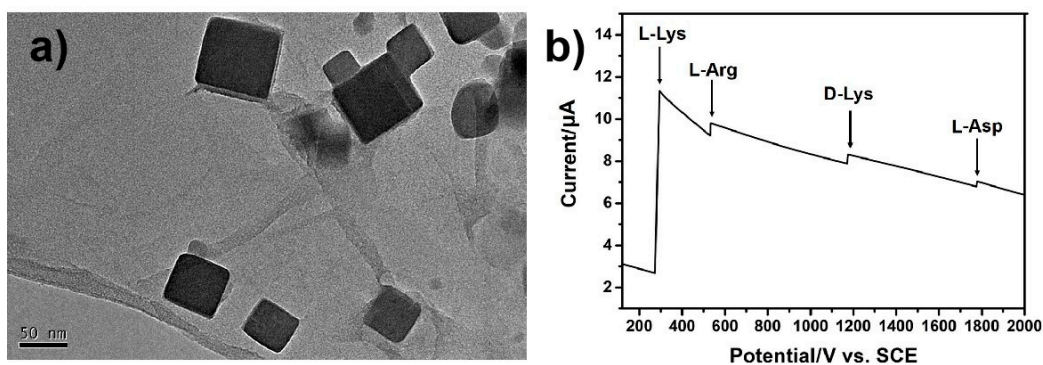

**Figure S3.** (a) Non-uniformity size distributed GR/In<sub>2</sub>O<sub>3</sub> nanocubes; (b) Current responses obtained at GR/In<sub>2</sub>O<sub>3</sub> nanocubes (with non-uniformity size range of 20–100 nm) based electrochemical sensor of amino acids extraction in *Camellia Nitidissima* Chi (extra addition D-Lys with a concentration of 0.45%), applied potential: 0.85 V.

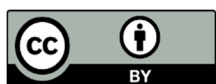

Supplement: s1 [file s1]
